# Supplementary material for: Plasmonic Strain Sensors Based on Au-TiO2 Thin Films on Flexible Substrates
Source: MDPI journal article supplement (doi:10.3390/s22041375), 2022-02-11
Supplement: s1 [file s1]

# Plasmonic strain sensors based on Au-TiO<sub>2</sub> thin films on flexible substrates

Marco S Rodrigues\*, Joel Borges, Filipe Vaz

CF-UM-UP, Centro de Física das Universidades do Minho e do Porto, Universidade do Minho, Portugal

\* Correspondence: marcopsr@gmail.com , mprodriques@fisica.uminho.pt

## 1. Optical simulations with gold nanoparticles using nanoDDSCAT+

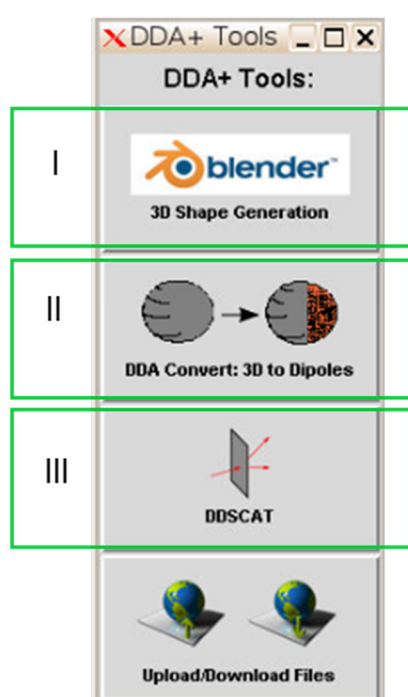

**Figure S1.** nanoDDSCAT+ software interface tools, freely available at “nanohub.org”. I - 3D shape generation (Blender tool); II - 3D shape to dipole conversion (DDA convert tool); III - Discrete dipole approximation code (DDSCAT tool).

## 2. Individual nanoparticles

### 2.1. LSPR Extinction Band for Nanoparticles of Different Shapes

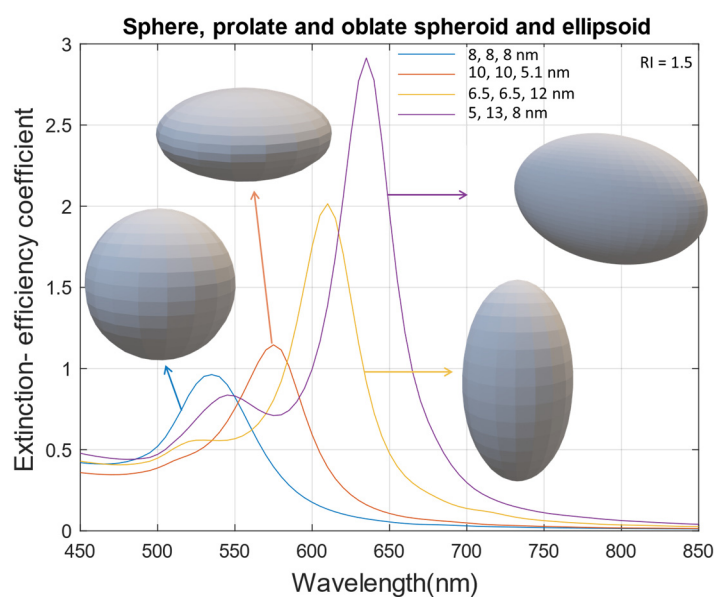

**Figure S2.** Optical extinction efficiency coefficient estimation of several shapes with nanoDDSCAT+

### 2.2. Compressing Single Nanoparticles

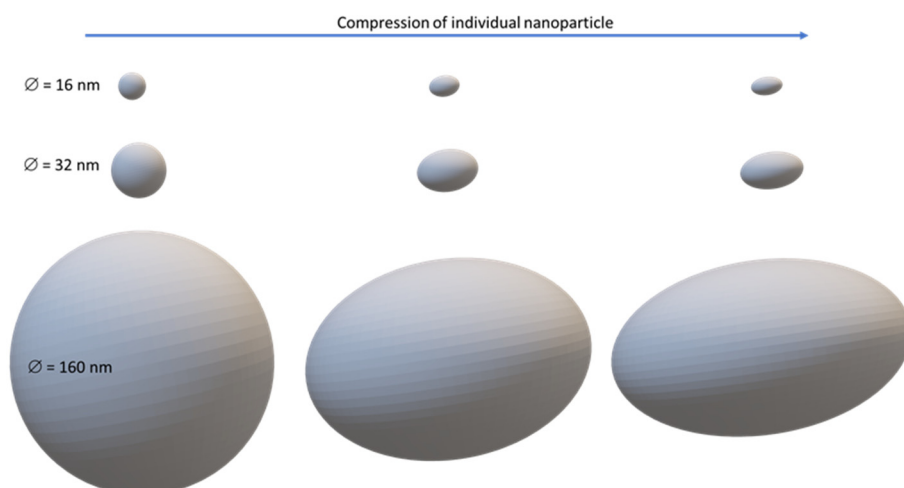

**Figure S3.** Nanoparticles being compressed change their aspect ratios ( $AR = 1$ ,  $AR = 1.4$  and  $AR = 1.8$ ) but keep the same effective volume.

### 3. Elongation of a 2D nanoparticles network

#### 3.1. Biaxial elongation of 16 nm gold nanoparticles network

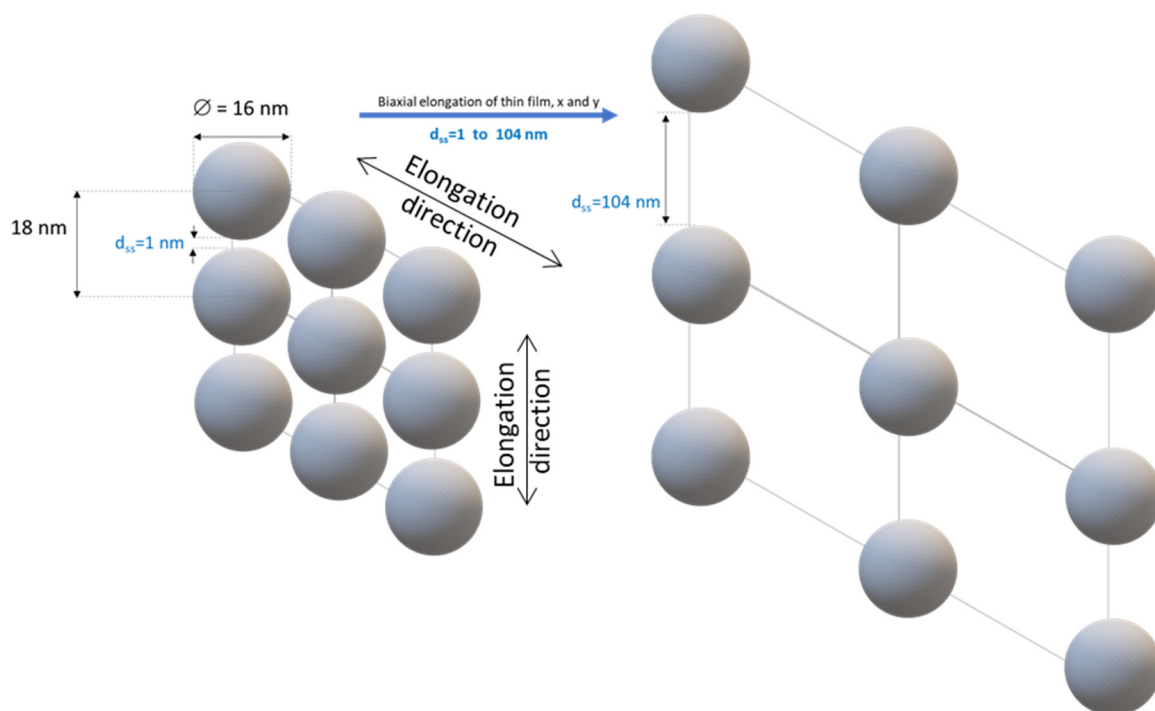

**Figure S4.** Array of 16 nm diameter nanoparticles being biaxially elongated

#### 3.2. Uniaxial elongation of 16 nm gold nanoparticles network under different surrounding refractive indices.

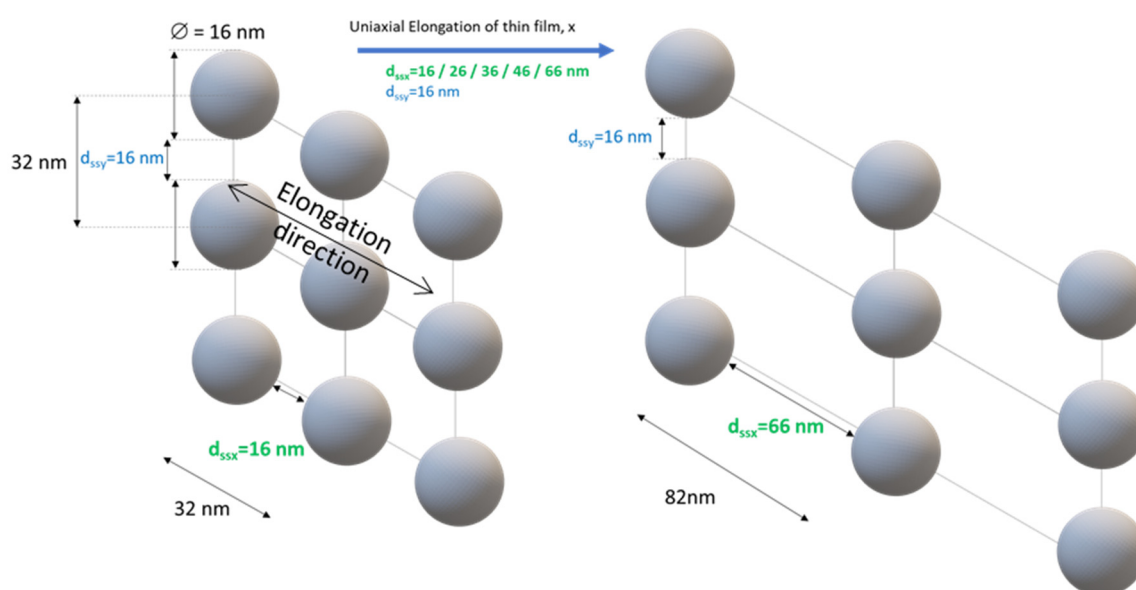

**Figure S5.** Array of 16 nm diameter nanoparticles being uniaxially elongated

### 3.3. Uniaxial elongation of 16 nm gold nanoparticles network with transverse compression.

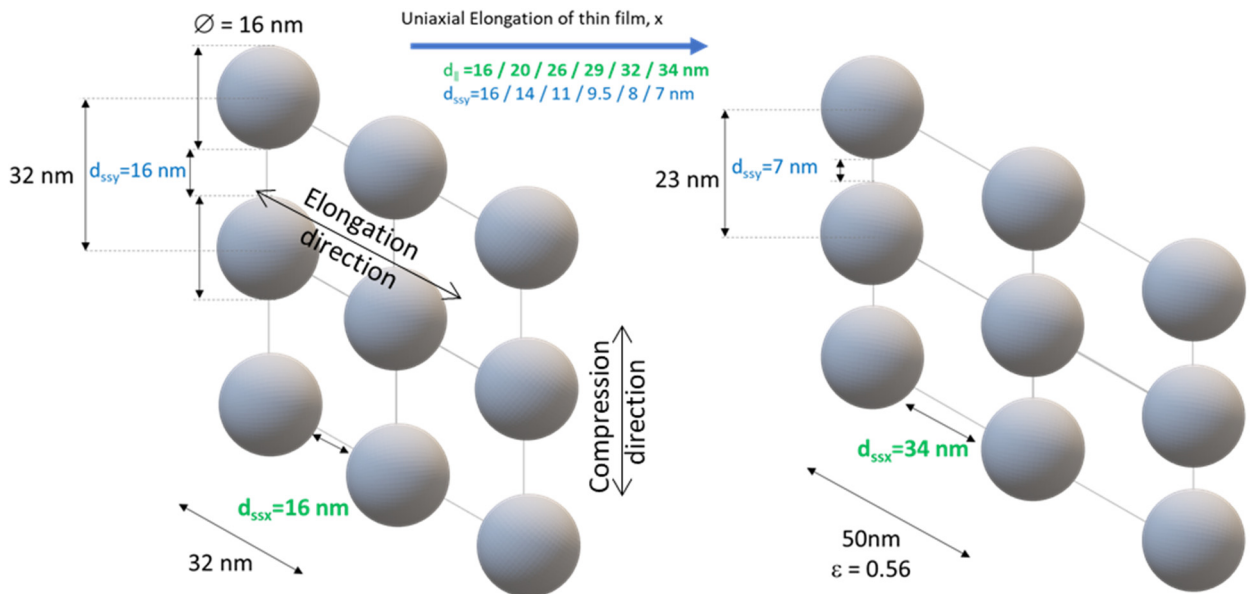

**Figure S6.** Array of 16 nm diameter nanoparticles being uniaxially elongated with transverse compression
